# Supplementary material
Source: Springer Nature journal article supplement (https://www.springermedizin.de/resource/supplementary/12959_2008_101_MOESM3_ESM.pdf/9569598)

**A** Collagen 2  $\mu\text{g/ml}$ 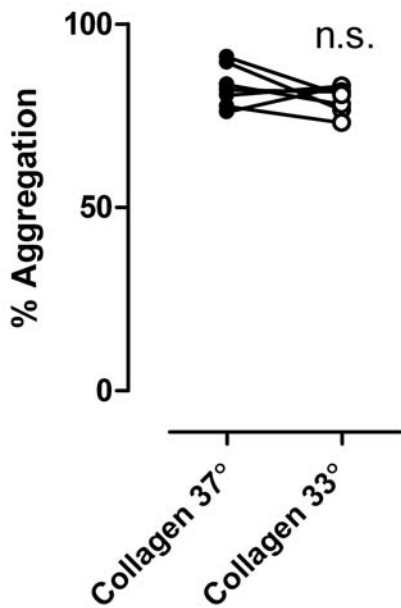**B** Collagen 2  $\mu\text{g/ml}$ 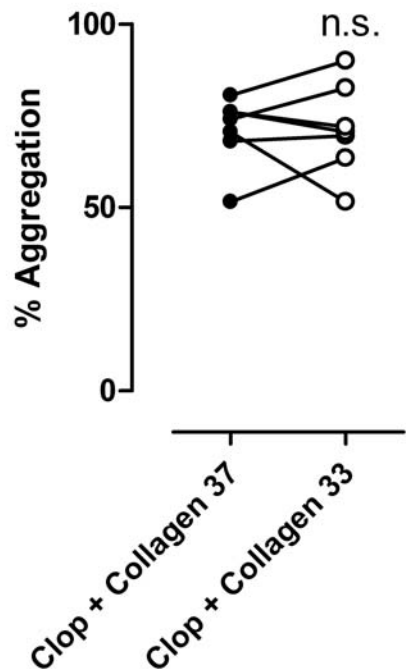**C** 5-HT 10  $\mu\text{M}$ 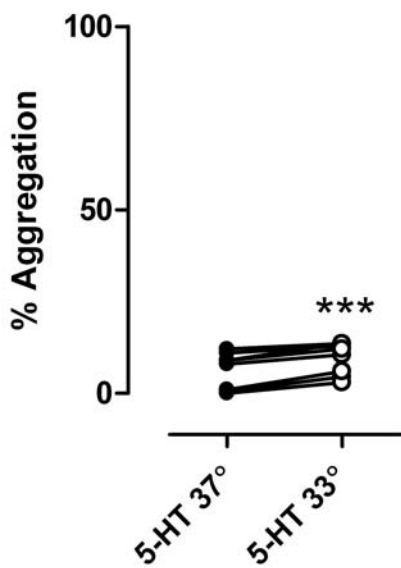**D** 5-HT 10  $\mu\text{M}$ 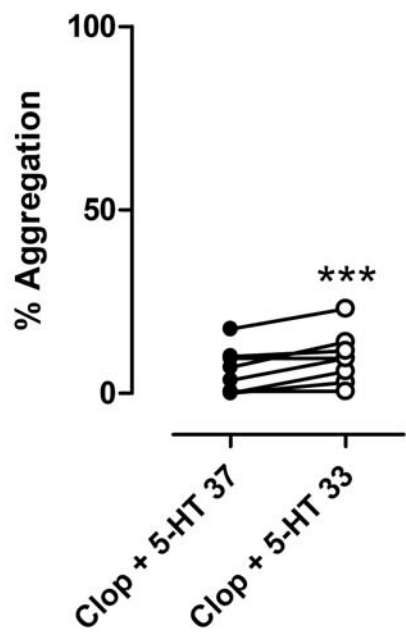

Supplement: MOESM3 [file 9569598]
